# Supplementary material for: A new toad species of the genus Brachytarsophrys Tian & Hu, 1983 (Anura, Megophryidae) from Guizhou Province, China
Source: Biodivers Data J. 2022 Feb 18;10:e79984. doi: 10.3897/BDJ.10.e79984 (PMC8881434; doi:10.3897/BDJ.10.e79984)
Supplement: Supplementary material 2 — Diagnostic characters separating the new species from other species of Brachytarsophrys [file bdj-10-e79984-s002.xlsx]

## Sheet: Sheet2
Morphological characters	B. qiannanensis sp. nov.	B. carinense	B. chuannanensis	B. feae	B. intermedia	B. orientalis	B. platyparietus	B. popei
SVL of males (in mm)	70.1 (n = 1)	91.6 – 123.0 (n = 4)	91.4 – 109.4 (n = 12 )	78.5 – 94.9 (n = 5)	86.0 – 103.0 (n = 7）	76.8 – 82.7 (n = 8)	88.5 – 113.0 (n = 6)	70.7 – 83.5 (n = 13)
SVL of females (in mm)	80.1–84.9 (n = 3)	124.0 – 168.0 (n = 3)	/	/	92 (n = 1)	/	118.5–131.0 (n = 3)	86.2 (n = 1)
Tongue	Feebly notched posteriorly	Feebly notched behind	Feebly notched behind	Feebly notched behind	Feebly notched behind	Feebly notched behind	Feebly notched behind	Deeply notched behind
Dermal ridge or glandular fold on dorsum	Absent	Dermal ridge on dorsum	Absent	Absent	Glandular fold on dorsum	Absent	Absent	Absent
Nuptial pad in male	Brown nuptial pad on dorsal surface of the first finger	/	Black nuptial pad on dorsal surface of the first and second fingers	Black brown nuptial pad on dorsal surface of the first and second fingers	/	Nuptial pad on dorsal surface of the first and second fingers	/	Black nuptial pad on dorsal surface of the first and second fingers
Webbing formula in male	I (1) - (2+) II (2-) - (3-) III (2½) - (4-) IV (4++) - (2-) V	/	I (1½) - (2++) II (2) - (3++) III (3)-(4) IV (4++) - (2½) V	I (2) - (2++) II (2-)-(3) III (2⅔) - (4) IV (4) - (2⅔) V	/	I (1½) - (2) II (1½) - (3) III (2½) - (4) IV (4)-(2) V	I (1½) - (2+) II (1½) - (3) III (2⅓) - (3⅔) IV (3⅔) - (2-) V	I (1½) - (2) II (1½)-(3) III (2½) - (3⅔) IV (3⅔) - (2) V
Webbing formula in female	I (1½) - (2+) II (2-) - (3+) III (2½) - (4) IV (4++) - (2) V	/	/	/	/	I (2) - (2+) II (1⅔) - (3) III (3-) - (4) IV (4+) - (2½) V	I (1½) - (2+) II (1½) - (3) III (2⅔) - (4-) IV (4-) - (2⅔) V	I (1½)-(2+) II (1½) - (3) III (2½) - (4-) IV (4-) - (2) V
Lateral fringes on toes of male	Narrow	/	Narrow	Narrow	/	Narrow	Wide	Narrow
Lateral fringes on toes of female	Narrow	/	/	/	/	Narrow	Narrow	Narrow
Position of tibiotarsal articulation reaching	commissure of jaw	Axilla in females, angle of mouth in males	Shoulder or commissure of jaw	Shoulder in females, commissure of jaw in males	Commissure of jaw	Commissure of jaw	Commissure of jaw	Commissure of jaw
